# Supplementary material for: Brain Genomics Superstruct Project initial data release with structural, functional, and behavioral measures
Source: PubMed Central journal article supplement (PMC4493828; doi:10.1038/sdata.2015.31), 2015-07-07
Supplement: sdata201531-s4.pdf [file sdata201531-s4.pdf]

|              |                         |    |     |                                                    |
|--------------|-------------------------|----|-----|----------------------------------------------------|
| (0008, 0005) | CharacterSet            | CS | 10  | ISO_IR 100                                         |
| (0008, 0008) | ImageType               | CS | 36  | ORIGINAL<br>PRIMARY<br>OTHER<br>ND<br>NORM<br>MEAN |
| (0008, 0012) | InstanceCreationDate    | DA | 8   | OMITTED HERE FOR IDENTIFICATION                    |
| (0008, 0013) | InstanceCreationTime    | TM | 14  | OMITTED HERE FOR IDENTIFICATION                    |
| (0008, 0016) | SopClass                | UI | 26  | OMITTED HERE FOR IDENTIFICATION                    |
| (0008, 0018) | SopInstance             | UI | 52  | OMITTED HERE FOR IDENTIFICATION                    |
| (0008, 0020) | StudyDate               | DA | 8   | OMITTED HERE FOR IDENTIFICATION                    |
| (0008, 0021) | SeriesDate              | DA | 8   | OMITTED HERE FOR IDENTIFICATION                    |
| (0008, 0022) | AcquisitionDate         | DA | 8   | OMITTED HERE FOR IDENTIFICATION                    |
| (0008, 0023) | ContentDate             | DA | 8   | OMITTED HERE FOR IDENTIFICATION                    |
| (0008, 0030) | StudyTime               | TM | 14  | OMITTED HERE FOR IDENTIFICATION                    |
| (0008, 0031) | SeriesTime              | TM | 14  | OMITTED HERE FOR IDENTIFICATION                    |
| (0008, 0032) | AcquisitionTime         | TM | 14  | OMITTED HERE FOR IDENTIFICATION                    |
| (0008, 0033) | ContentTime             | TM | 14  | OMITTED HERE FOR IDENTIFICATION                    |
| (0008, 0050) | AcessionNumber          | SH | 0   |                                                    |
| (0008, 0060) | Modality                | CS | 2   | MR                                                 |
| (0008, 0070) | Manufacturer            | LO | 8   | SIEMENS                                            |
| (0008, 0080) | InstitutionName         | LO | 16  | OMITTED HERE FOR IDENTIFICATION                    |
| (0008, 0081) | InstitutionAddress      | ST | 32  | OMITTED HERE FOR IDENTIFICATION                    |
| (0008, 0090) | ReferringPhysician      | PN | 0   |                                                    |
| (0008, 1010) | StationName             | SH | 6   | MEDPC                                              |
| (0008, 1030) | StudyDescription        | LO | 22  | OMITTED HERE FOR IDENTIFICATION                    |
| (0008, 103e) | SeriesDescription       | LO | 16  | T1_MEMPRAGE RMS                                    |
| (0008, 1050) | PerformingPhysician     | PN | 0   |                                                    |
| (0008, 1070) | OperatorName            | PN | 6   | OMITTED HERE FOR IDENTIFICATION                    |
| (0008, 1090) | ModelName               | LO | 8   | TrioTim                                            |
| (0008, 1140) | ReferencedImageSequence | SQ | 306 | $\sqrt{x/y}$                                       |
| (0010, 0010) | PatientName             | PN | 16  | OMITTED HERE FOR IDENTIFICATION                    |
| (0010, 0020) | PatientId               | LO | 48  | OMITTED HERE FOR IDENTIFICATION                    |
| (0010, 0030) | PatientBirthDate        | DA | 8   | OMITTED HERE FOR IDENTIFICATION                    |
| (0010, 0040) | PatientSex              | CS | 2   | F                                                  |
| (0010, 1010) | PatientAge              | AS | 4   | OMITTED HERE FOR IDENTIFICATION                    |
| (0010, 1030) | PatientWeight           | DS | 14  | OMITTED HERE FOR IDENTIFICATION                    |
| (0018, 0020) | ScanningSequence        | CS | 6   | GR<br>IR                                           |
| (0018, 0021) | SequenceVariant         | CS | 6   | SP<br>MP                                           |
| (0018, 0022) | ScanOptions             | CS | 6   | IR<br>PFP                                          |
| (0018, 0023) | MrAcquisitionType       | CS | 2   | 3D                                                 |
| (0018, 0024) | SequenceName            | SH | 10  | tfl3d4_ns                                          |
| (0018, 0025) | AngioFlag               | CS | 2   | N                                                  |
| (0018, 0050) | SliceThickness          | DS | 16  | 1.2000000476837                                    |
| (0018, 0080) | RepetitionTime          | DS | 4   | 2200                                               |
| (0018, 0081) | EchoTime                | DS | 4   | 1.54                                               |
| (0018, 0082) | InversionTime           | DS | 4   | 1100                                               |

|              |                        |    |    |                                                            |
|--------------|------------------------|----|----|------------------------------------------------------------|
| (0018, 0083) | NumberOfAverages       | DS | 2  | 4                                                          |
| (0018, 0084) | ImagingFrequency       | DS | 10 | 123.263739                                                 |
| (0018, 0085) | ImagingNucleus         | SH | 2  | 1H                                                         |
| (0018, 0086) | EchoNumber             | IS | 2  | 1                                                          |
| (0018, 0087) | MagneticFieldStrength  | DS | 2  | 3                                                          |
| (0018, 0089) | PhaseEncodingSteps     | IS | 4  | 145                                                        |
| (0018, 0091) | EchoTrainLength        | IS | 2  | 1                                                          |
| (0018, 0093) | PercentSampling        | DS | 4  | 100                                                        |
| (0018, 0094) | PercentPhaseFov        | DS | 4  | 100                                                        |
| (0018, 0095) | PixelBandwidth         | DS | 4  | 651                                                        |
| (0018, 1000) | DeviceSerialNumber     | LO | 6  | OMITTED HERE FOR IDENTIFICATION                            |
| (0018, 1020) | SoftwareVersion        | LO | 12 | syngo MR B17                                               |
| (0018, 1030) | ProtocolName           | LO | 12 | T1_MEMPRAGE                                                |
| (0018, 1251) | TransmittingCoil       | SH | 4  | Body                                                       |
| (0018, 1310) | AcquisitionMatrix      | US | 8  | 0                                                          |
|              |                        |    |    | 192                                                        |
|              |                        |    |    | 192                                                        |
|              |                        |    |    | 0                                                          |
| (0018, 1312) | PhaseEncodingDirection | CS | 4  | ROW                                                        |
| (0018, 1314) | FlipAngle              | DS | 2  | 7                                                          |
| (0018, 1315) | VariableFlipAngleFlag  | CS | 2  | N                                                          |
| (0018, 1316) | SAR                    | DS | 16 | 0.07379501370909                                           |
| (0018, 1318) | DB_DT                  | DS | 2  | 0                                                          |
| (0018, 5100) | PatientPosition        | CS | 4  | HFS                                                        |
| (0019, 0010) | unknown                | LO | 18 | SIEMENS MR HEADER                                          |
| (0019, 1008) | unknown                | CS | 12 | IMAGE NUM 4                                                |
| (0019, 1009) | unknown                | LO | 4  | 1.0                                                        |
| (0019, 100b) | unknown                | DS | 8  | 131727.5                                                   |
| (0019, 100f) | unknown                | SH | 4  | Fast                                                       |
| (0019, 1011) | unknown                | SH | 2  | No                                                         |
| (0019, 1012) | unknown                | SL | 12 | 0                                                          |
|              |                        |    |    | 0                                                          |
|              |                        |    |    | -1275                                                      |
| (0019, 1013) | unknown                | SL | 12 | 0                                                          |
|              |                        |    |    | 0                                                          |
|              |                        |    |    | -1275                                                      |
| (0019, 1014) | unknown                | IS | 6  | 0                                                          |
|              |                        |    |    | 0                                                          |
|              |                        |    |    | 0                                                          |
| (0019, 1015) | unknown                | FD | 24 | -13.5665                                                   |
|              |                        |    |    | -123.575                                                   |
|              |                        |    |    | 105.842                                                    |
| (0019, 1017) | unknown                | DS | 2  | 1                                                          |
| (0019, 1018) | unknown                | IS | 4  | 4000                                                       |
| (0020, 000d) | StudyInstanceUid       | UI | 56 | 1.3.12.2.1107.5.2.32.35380.30000010041618553290100000157   |
| (0020, 000e) | SeriesInstanceUid      | UI | 58 | 1.3.12.2.1107.5.2.32.35380.2010042416072655750002973.0.0.0 |
| (0020, 0010) | StudyId                | SH | 2  | 1                                                          |
| (0020, 0011) | SeriesNumber           | IS | 2  | 5                                                          |
| (0020, 0012) | AcquisitionNumber      | IS | 2  | 1                                                          |
| (0020, 0013) | InstanceNumber         | IS | 2  | 72                                                         |
| (0020, 0032) | ImagePositionPatient   | DS | 50 | -13.566503167318                                           |

|              |                                 |    |      |                                                      |
|--------------|---------------------------------|----|------|------------------------------------------------------|
|              |                                 |    |      | -123.57515817126                                     |
|              |                                 |    |      | 105.84205514206                                      |
| (0020, 0037) | ImageOrientationPatient         | DS | 102  | 0.04179473190323                                     |
|              |                                 |    |      | 0.99780385064773                                     |
|              |                                 |    |      | -0.0513875083819                                     |
|              |                                 |    |      | 0.03408366365402                                     |
|              |                                 |    |      | -0.0528263900391                                     |
|              |                                 |    |      | -0.9980218817177                                     |
| (0020, 0052) | FrameOfReferenceUid             | UI | 52   | 1.3.12.2.1107.5.2.32.35380.1.20100424160346351.0.0.0 |
| (0020, 1040) | PositionReference               | LO | 0    |                                                      |
| (0020, 1041) | SliceLocation                   | DS | 16   | -4.7753770674885                                     |
| (0028, 0002) | SamplesPerPixel                 | US | 2    | 1                                                    |
| (0028, 0004) | PhotometricInterpretation       | CS | 12   | MONOCHROME2                                          |
| (0028, 0010) | ImageRows                       | US | 2    | 192                                                  |
| (0028, 0011) | ImageColumns                    | US | 2    | 192                                                  |
| (0028, 0030) | PixelSpacing                    | DS | 32   | 1.1979166269302                                      |
|              |                                 |    |      | 1.1979166269302                                      |
| (0028, 0100) | BitsAllocated                   | US | 2    | 16                                                   |
| (0028, 0101) | BitsStored                      | US | 2    | 12                                                   |
| (0028, 0102) | HighBit                         | US | 2    | 11                                                   |
| (0028, 0103) | PixelRepresentation             | US | 2    | 0                                                    |
| (0028, 0106) | SmallestImagePixelValue         | US | 2    | 0                                                    |
| (0028, 0107) | LargestImagePixelValue          | US | 2    | 488                                                  |
| (0028, 1050) | WindowCenter                    | DS | 4    | 281                                                  |
| (0028, 1051) | WindowWidth                     | DS | 4    | 617                                                  |
| (0028, 1055) | WindowCenterAndWidthExplanation | LO | 6    | Algo1                                                |
| (0029, 0010) | unknown                         | LO | 18   | SIEMENS CSA HEADER                                   |
| (0029, 0011) | unknown                         | LO | 22   | SIEMENS MEDCOM HEADER2                               |
| (0029, 1008) | unknown                         | CS | 12   | IMAGE NUM 4                                          |
| (0029, 1009) | unknown                         | LO | 8    | 20100424                                             |
| (0029, 1010) | unknown                         | OB | 9468 |                                                      |

---

-----S

|              |         |    |       |          |
|--------------|---------|----|-------|----------|
| (0029, 1018) | unknown | CS | 2     | MR       |
| (0029, 1019) | unknown | LO | 8     | 20100424 |
| (0029, 1020) | unknown | OB | 58256 |          |

---

-----A

|              |                                   |    |    |                       |
|--------------|-----------------------------------|----|----|-----------------------|
| (0029, 1160) | unknown                           | LO | 4  | com                   |
| (0032, 1060) | RequestedProcedureDescription     | LO | 22 | Investigators Buckner |
| (0040, 0244) | PerformedProcedureStepStartDate   | DA | 8  | 20100424              |
| (0040, 0245) | PerformedProcedureStepStartTime   | TM | 14 | 160115.174000         |
| (0040, 0253) | PerformedProcedureStepId          | SH | 16 | MR20100424160115      |
| (0040, 0254) | PerformedProcedureStepDescription | LO | 22 | Investigators^Buckner |
| (0051, 0010) | unknown                           | LO | 18 | SIEMENS MR HEADER     |
| (0051, 1008) | unknown                           | CS | 12 | IMAGE NUM 4           |
| (0051, 1009) | unknown                           | LO | 4  | 1.0                   |
| (0051, 100a) | unknown                           | LO | 8  | TA 02:11              |
| (0051, 100b) | unknown                           | LO | 8  | 192p*192              |

|              |         |    |    |                        |
|--------------|---------|----|----|------------------------|
| (0051, 100c) | unknown | LO | 12 | FoV 229*229            |
| (0051, 100d) | unknown | SH | 8  | SP R4.8                |
| (0051, 100e) | unknown | LO | 22 | Sag>Cor(2.3)>Tra(-2.1) |
| (0051, 100f) | unknown | LO | 10 | T:HEA;HEP              |
| (0051, 1011) | unknown | LO | 2  | p4                     |
| (0051, 1012) | unknown | SH | 4  | TP 0                   |
| (0051, 1013) | unknown | SH | 4  | +LPH                   |
| (0051, 1016) | unknown | LO | 16 | p4 ND                  |
|              |         |    |    | NORM                   |
|              |         |    |    | MEAN                   |
| (0051, 1017) | unknown | SH | 6  | SL 1.2                 |
| (0051, 1019) | unknown | LO | 10 | A4                     |
|              |         |    |    | IR                     |
|              |         |    |    | PFP                    |
