# Supplementary material for: Brain Genomics Superstruct Project initial data release with structural, functional, and behavioral measures
Source: PubMed Central journal article supplement (PMC4493828; doi:10.1038/sdata.2015.31), 2015-07-07
Supplement: sdata201531-s5.pdf [file sdata201531-s5.pdf]

|              |                         |    |     |                                          |
|--------------|-------------------------|----|-----|------------------------------------------|
| (0008, 0005) | CharacterSet            | CS | 10  | ISO_IR 100                               |
| (0008, 0008) | ImageType               | CS | 28  | ORIGINAL<br>PRIMARY<br>M<br>ND<br>MOSAIC |
| (0008, 0012) | InstanceCreationDate    | DA | 8   | OMITTED HERE FOR IDENTIFICATION          |
| (0008, 0013) | InstanceCreationTime    | TM | 14  | OMITTED HERE FOR IDENTIFICATION          |
| (0008, 0016) | SopClass                | UI | 26  | OMITTED HERE FOR IDENTIFICATION          |
| (0008, 0018) | SopInstance             | UI | 52  | OMITTED HERE FOR IDENTIFICATION          |
| (0008, 0020) | StudyDate               | DA | 8   | OMITTED HERE FOR IDENTIFICATION          |
| (0008, 0021) | SeriesDate              | DA | 8   | OMITTED HERE FOR IDENTIFICATION          |
| (0008, 0022) | AcquisitionDate         | DA | 8   | OMITTED HERE FOR IDENTIFICATION          |
| (0008, 0023) | ContentDate             | DA | 8   | OMITTED HERE FOR IDENTIFICATION          |
| (0008, 0030) | StudyTime               | TM | 14  | OMITTED HERE FOR IDENTIFICATION          |
| (0008, 0031) | SeriesTime              | TM | 14  | OMITTED HERE FOR IDENTIFICATION          |
| (0008, 0032) | AcquisitionTime         | TM | 14  | OMITTED HERE FOR IDENTIFICATION          |
| (0008, 0033) | ContentTime             | TM | 14  | OMITTED HERE FOR IDENTIFICATION          |
| (0008, 0050) | AcessionNumber          | SH | 0   |                                          |
| (0008, 0060) | Modality                | CS | 2   | MR                                       |
| (0008, 0070) | Manufacturer            | LO | 8   | SIEMENS                                  |
| (0008, 0080) | InstitutionName         | LO | 16  | OMITTED HERE FOR IDENTIFICATION          |
| (0008, 0081) | InstitutionAddress      | ST | 32  | OMITTED HERE FOR IDENTIFICATION          |
| (0008, 0090) | ReferringPhysician      | PN | 0   |                                          |
| (0008, 1010) | StationName             | SH | 6   | MEDPC                                    |
| (0008, 1030) | StudyDescription        | LO | 22  | OMITTED HERE FOR IDENTIFICATION          |
| (0008, 103e) | SeriesDescription       | LO | 18  | fMRI_resting_state                       |
| (0008, 1050) | PerformingPhysician     | PN | 0   |                                          |
| (0008, 1070) | OperatorName            | PN | 6   | OMITTED HERE FOR IDENTIFICATION          |
| (0008, 1090) | ModelName               | LO | 8   | TrioTim                                  |
| (0008, 1140) | ReferencedImageSequence | SQ | 306 | $\sqrt{\pi}/\phi$                        |
| (0010, 0010) | PatientName             | PN | 16  | OMITTED HERE FOR IDENTIFICATION          |
| (0010, 0020) | PatientId               | LO | 48  | OMITTED HERE FOR IDENTIFICATION          |
| (0010, 0030) | PatientBirthDate        | DA | 8   | OMITTED HERE FOR IDENTIFICATION          |
| (0010, 0040) | PatientSex              | CS | 2   | F                                        |
| (0010, 1010) | PatientAge              | AS | 4   | OMITTED HERE FOR IDENTIFICATION          |
| (0010, 1030) | PatientWeight           | DS | 14  | OMITTED HERE FOR IDENTIFICATION          |
| (0018, 0020) | ScanningSequence        | CS | 2   | EP                                       |
| (0018, 0021) | SequenceVariant         | CS | 2   | SK                                       |
| (0018, 0022) | ScanOptions             | CS | 2   | FS                                       |
| (0018, 0023) | MrAcquisitionType       | CS | 2   | 2D                                       |
| (0018, 0024) | SequenceName            | SH | 12  | epfid2d1_72                              |
| (0018, 0025) | AngioFlag               | CS | 2   | N                                        |
| (0018, 0050) | SliceThickness          | DS | 2   | 3                                        |
| (0018, 0080) | RepetitionTime          | DS | 4   | 3000                                     |
| (0018, 0081) | EchoTime                | DS | 2   | 30                                       |
| (0018, 0083) | NumberOfAverages        | DS | 2   | 1                                        |
| (0018, 0084) | ImagingFrequency        | DS | 10  | 123.26374                                |
| (0018, 0085) | ImagingNucleus          | SH | 2   | 1H                                       |
| (0018, 0086) | EchoNumber              | IS | 2   | 1                                        |
| (0018, 0087) | MagneticFieldStrength   | DS | 2   | 3                                        |

|              |                        |    |     |                                 |
|--------------|------------------------|----|-----|---------------------------------|
| (0018, 0088) | SliceSpacing           | DS | 16  | 2.9999999039362                 |
| (0018, 0089) | PhaseEncodingSteps     | IS | 2   | 72                              |
| (0018, 0091) | EchoTrainLength        | IS | 2   | 1                               |
| (0018, 0093) | PercentSampling        | DS | 4   | 100                             |
| (0018, 0094) | PercentPhaseFov        | DS | 4   | 100                             |
| (0018, 0095) | PixelBandwidth         | DS | 4   | 2240                            |
| (0018, 1000) | DeviceSerialNumber     | LO | 6   | OMITTED HERE FOR IDENTIFICATION |
| (0018, 1020) | SoftwareVersion        | LO | 12  | syngo MR B17                    |
| (0018, 1030) | ProtocolName           | LO | 18  | fMRI_resting_state              |
| (0018, 1251) | TransmittingCoil       | SH | 4   | Body                            |
| (0018, 1310) | AcquisitionMatrix      | US | 8   | 72                              |
|              |                        |    |     | 0                               |
|              |                        |    |     | 0                               |
|              |                        |    |     | 72                              |
| (0018, 1312) | PhaseEncodingDirection | CS | 4   | COL                             |
| (0018, 1314) | FlipAngle              | DS | 2   | 85                              |
| (0018, 1315) | VariableFlipAngleFlag  | CS | 2   | N                               |
| (0018, 1316) | SAR                    | DS | 16  | 0.14298183329098                |
| (0018, 1318) | DB_DT                  | DS | 2   | 0                               |
| (0018, 5100) | PatientPosition        | CS | 4   | HFS                             |
| (0019, 0010) | unknown                | LO | 18  | SIEMENS MR HEADER               |
| (0019, 1008) | unknown                | CS | 12  | IMAGE NUM 4                     |
| (0019, 1009) | unknown                | LO | 4   | 1.0                             |
| (0019, 100a) | unknown                | US | 2   | 47                              |
| (0019, 100b) | unknown                | DS | 2   | 35                              |
| (0019, 100f) | unknown                | SH | 4   | Fast                            |
| (0019, 1011) | unknown                | SH | 2   | No                              |
| (0019, 1012) | unknown                | SL | 12  | 0                               |
|              |                        |    |     | 0                               |
|              |                        |    |     | -1275                           |
| (0019, 1013) | unknown                | SL | 12  | 0                               |
|              |                        |    |     | 0                               |
|              |                        |    |     | -1275                           |
| (0019, 1014) | unknown                | IS | 6   | 0                               |
|              |                        |    |     | 0                               |
|              |                        |    |     | 0                               |
| (0019, 1015) | unknown                | FD | 24  | -788.847                        |
|              |                        |    |     | -736.79                         |
|              |                        |    |     | -52.9814                        |
| (0019, 1016) | unknown                | DS | 6   | 96.385                          |
| (0019, 1017) | unknown                | DS | 2   | 1                               |
| (0019, 1018) | unknown                | IS | 4   | 3100                            |
| (0019, 1028) | unknown                | FD | 8   | 27.233                          |
| (0019, 1029) | unknown                | FD | 376 | 0                               |
|              |                        |    |     | 1537.5                          |
|              |                        |    |     | 65                              |
|              |                        |    |     | 1602.5                          |
|              |                        |    |     | 127.5                           |
|              |                        |    |     | 1665                            |
|              |                        |    |     | 192.5                           |
|              |                        |    |     | 1730                            |

|              |                         |    |     |                                 |
|--------------|-------------------------|----|-----|---------------------------------|
|              |                         |    |     | 255                             |
|              |                         |    |     | 1795                            |
|              |                         |    |     | 320                             |
|              |                         |    |     | 1857.5                          |
|              |                         |    |     | 385                             |
|              |                         |    |     | 1922.5                          |
|              |                         |    |     | 447.5                           |
|              |                         |    |     | 1985                            |
|              |                         |    |     | 512.5                           |
|              |                         |    |     | 2050                            |
|              |                         |    |     | 577.5                           |
|              |                         |    |     | 2115                            |
|              |                         |    |     | 640                             |
|              |                         |    |     | 2177.5                          |
|              |                         |    |     | 705                             |
|              |                         |    |     | 2242.5                          |
|              |                         |    |     | 770                             |
|              |                         |    |     | 2307.5                          |
|              |                         |    |     | 832.5                           |
|              |                         |    |     | 2370                            |
|              |                         |    |     | 897.5                           |
|              |                         |    |     | 2435                            |
|              |                         |    |     | 960                             |
|              |                         |    |     | 2500                            |
|              |                         |    |     | 1025                            |
|              |                         |    |     | 2562.5                          |
|              |                         |    |     | 1090                            |
|              |                         |    |     | 2627.5                          |
|              |                         |    |     | 1152.5                          |
|              |                         |    |     | 2690                            |
|              |                         |    |     | 1217.5                          |
|              |                         |    |     | 2755                            |
|              |                         |    |     | 1282.5                          |
|              |                         |    |     | 2820                            |
|              |                         |    |     | 1345                            |
|              |                         |    |     | 2882.5                          |
|              |                         |    |     | 1410                            |
|              |                         |    |     | 2947.5                          |
|              |                         |    |     | 1472.5                          |
| (0020, 000d) | StudyInstanceUid        | UI | 56  | OMITTED HERE FOR IDENTIFICATION |
| (0020, 000e) | SeriesInstanceUid       | UI | 58  | OMITTED HERE FOR IDENTIFICATION |
| (0020, 0010) | StudyId                 | SH | 2   | 1                               |
| (0020, 0011) | SeriesNumber            | IS | 2   | 14                              |
| (0020, 0012) | AcquisitionNumber       | IS | 2   | 33                              |
| (0020, 0013) | InstanceNumber          | IS | 2   | 33                              |
| (0020, 0032) | ImagePositionPatient    | DS | 50  | -788.84719829265                |
|              |                         |    |     | -736.78994392663                |
|              |                         |    |     | -52.981431394183                |
| (0020, 0037) | ImageOrientationPatient | DS | 100 | 0.9985446782004                 |
|              |                         |    |     | -0.0399606693677                |
|              |                         |    |     | 0.03621699243911                |

0.04179484065056  
0.99780383837675  
-0.0513876582033

|              |                                 |    |       |                                                      |
|--------------|---------------------------------|----|-------|------------------------------------------------------|
| (0020, 0052) | FrameOfReferenceUid             | UI | 52    | 1.3.12.2.1107.5.2.32.35380.1.20100424160346351.0.0.0 |
| (0020, 1040) | PositionReference               | LO | 0     |                                                      |
| (0020, 1041) | SliceLocation                   | DS | 16    | -64.911658774742                                     |
| (0028, 0002) | SamplesPerPixel                 | US | 2     | 1                                                    |
| (0028, 0004) | PhotometricInterpretation       | CS | 12    | MONOCHROME2                                          |
| (0028, 0010) | ImageRows                       | US | 2     | 504                                                  |
| (0028, 0011) | ImageColumns                    | US | 2     | 504                                                  |
| (0028, 0030) | PixelSpacing                    | DS | 4     | 3                                                    |
|              |                                 |    |       | 3                                                    |
| (0028, 0100) | BitsAllocated                   | US | 2     | 16                                                   |
| (0028, 0101) | BitsStored                      | US | 2     | 12                                                   |
| (0028, 0102) | HighBit                         | US | 2     | 11                                                   |
| (0028, 0103) | PixelRepresentation             | US | 2     | 0                                                    |
| (0028, 0106) | SmallestImagePixelValue         | US | 2     | 0                                                    |
| (0028, 0107) | LargestImagePixelValue          | US | 2     | 1887                                                 |
| (0028, 1050) | WindowCenter                    | DS | 4     | 703                                                  |
| (0028, 1051) | WindowWidth                     | DS | 4     | 1517                                                 |
| (0028, 1055) | WindowCenterAndWidthExplanation | LO | 6     | Algol                                                |
| (0029, 0010) | unknown                         | LO | 18    | SIEMENS CSA HEADER                                   |
| (0029, 0011) | unknown                         | LO | 22    | SIEMENS MEDCOM HEADER2                               |
| (0029, 1008) | unknown                         | CS | 12    | IMAGE NUM 4                                          |
| (0029, 1009) | unknown                         | LO | 8     | 20100424                                             |
| (0029, 1010) | unknown                         | OB | 11220 |                                                      |

SV10

---

S

|              |         |    |       |          |
|--------------|---------|----|-------|----------|
| (0029, 1018) | unknown | CS | 2     | MR       |
| (0029, 1019) | unknown | LO | 8     | 20100424 |
| (0029, 1020) | unknown | OB | 86208 |          |

SV10

---

A

|              |                                   |    |    |                                 |
|--------------|-----------------------------------|----|----|---------------------------------|
| (0029, 1160) | unknown                           | LO | 4  | com                             |
| (0032, 1060) | RequestedProcedureDescription     | LO | 22 | OMITTED HERE FOR IDENTIFICATION |
| (0040, 0244) | PerformedProcedureStepStartDate   | DA | 8  | OMITTED HERE FOR IDENTIFICATION |
| (0040, 0245) | PerformedProcedureStepStartTime   | TM | 14 | OMITTED HERE FOR IDENTIFICATION |
| (0040, 0253) | PerformedProcedureStepId          | SH | 16 | OMITTED HERE FOR IDENTIFICATION |
| (0040, 0254) | PerformedProcedureStepDescription | LO | 22 | OMITTED HERE FOR IDENTIFICATION |
| (0051, 0010) | unknown                           | LO | 18 | SIEMENS MR HEADER               |
| (0051, 1008) | unknown                           | CS | 12 | IMAGE NUM 4                     |
| (0051, 1009) | unknown                           | LO | 4  | 1.0                             |
| (0051, 100a) | unknown                           | LO | 8  | TA 00.03                        |
| (0051, 100b) | unknown                           | LO | 6  | 72*72                           |
| (0051, 100c) | unknown                           | LO | 14 | FoV 1512*1512                   |
| (0051, 100e) | unknown                           | LO | 22 | Tra>Cor(-3.0)>Sag(2.0)          |
| (0051, 100f) | unknown                           | LO | 10 | C:HEA;HEP                       |
| (0051, 1012) | unknown                           | SH | 4  | TP 0                            |
| (0051, 1013) | unknown                           | SH | 4  | +LPH                            |

|              |         |    |    |        |
|--------------|---------|----|----|--------|
| (0051, 1016) | unknown | LO | 12 | M      |
|              |         |    |    | ND     |
|              |         |    |    | MOSAIC |
| (0051, 1017) | unknown | SH | 6  | SL 3.0 |
| (0051, 1019) | unknown | LO | 6  | A1     |
|              |         |    |    | FS     |
