# Supplementary material for: Brain Genomics Superstruct Project initial data release with structural, functional, and behavioral measures
Source: PubMed Central journal article supplement (PMC4493828; doi:10.1038/sdata.2015.31), 2015-07-07
Supplement: sdata201531-s6.pdf [file sdata201531-s6.pdf]

## Phenotypes Legend

| Phenotype         | Description                                                                                                                                                                                                                           |
|-------------------|---------------------------------------------------------------------------------------------------------------------------------------------------------------------------------------------------------------------------------------|
| Subject_ID        | The anonymous data release ID.                                                                                                                                                                                                        |
| Delay             | The number of days between test and retest scans.                                                                                                                                                                                     |
| Subject_Rescan_ID | The anonymous data release ID for subjects who were re-scanned within six months of their initial scan date.                                                                                                                          |
| MRI               | Reflects the number of eyes open rest runs available (1, 2).                                                                                                                                                                          |
| Behavior          | Reflects the presence of behavioral data (Present, Absent).                                                                                                                                                                           |
| Sex               | Sex (M, F).                                                                                                                                                                                                                           |
| Age_Bin           | The binned age (2 year bins) of each participant at the time of image acquisition. Participants who were from 18-19 years of age at the point of scan are coded as 19, participants who were 20-21 years of age are coded as 21, etc. |
| Hand              | Participant handedness (RHT, LFT, AMB).                                                                                                                                                                                               |
| Educ              | Years of education. Please note, due to the characteristics of the sample education is truncated by the age of the participant and should not be interpreted as an accurate reflection (nor a proxy) of SES.                          |
| Race_Ethn         | Participant race/ethnicity (White not Hispanic = W_NOT_HL, all other race/ethnicities = Other).                                                                                                                                       |
| Scanner_Bin       | Site/Scanner bay where the data were acquired (A, B, C, D, E).                                                                                                                                                                        |
| Console           | Console software version on scanner at the time of image acquisition (B13, B15, B17).                                                                                                                                                 |
| Coil              | Coil version (currently all 12-channel coils = Tim_12).                                                                                                                                                                               |
| ANAT              | The run number for the T1 MEMPRAGE anatomical scan (1).                                                                                                                                                                               |
| BOLD1             | The run number for the first eyes open rest run (2).                                                                                                                                                                                  |
| BOLD1_sSNR        | Slice based SNR for first eyes open rest run.                                                                                                                                                                                         |
| BOLD1_MotMicro    | Number of relative translations in 3D space $\geq 0.1$ mm.                                                                                                                                                                            |
| BOLD1_MotAbsMax   | Maximum absolute translation in 3D space (mm).                                                                                                                                                                                        |
| BOLD2             | The run number for the second eyes open rest run when present (3).                                                                                                                                                                    |

|                     |                                                                                              |
|---------------------|----------------------------------------------------------------------------------------------|
| BOLD2_sSNR          | Slice based SNR for second eyes open rest run.                                               |
| BOLD2_MotMicro      | Number of relative translations in 3D space $\geq 0.1$ mm.                                   |
| BOLD2_MotAbsMax     | Maximum absolute translation in 3D space (mm).                                               |
| Flank_S_CORRpc      | The percentage of correct responses for the flanker task during switch blocks.               |
| Flank_S_meanRTcorr  | The mean reaction time (RT) for correct flanker task trials during switch blocks.            |
| Flank_S_medRTcorr   | The median RT for correct flanker task trials during switch blocks.                          |
| Flank_S_score       | The number of correct trials minus the number of incorrect trials for the switch blocks.     |
| Flank_NS_CORRpc     | The percentage of correct responses for the flanker task during non-switch blocks.           |
| Flank_NS_meanRTcorr | The mean RT for the correct flanker task trials during non-switch blocks.                    |
| Flank_NS_medRTcorr  | The median RT for the correct flanker task trials during the non-switch blocks.              |
| Flank_NS_score      | The number of correct trials minus the number of incorrect trials for the non-switch blocks. |
| Flank_CORRpc        | The percent of correct responses for the flanker task.                                       |
| Flank_meanRTcorr    | The mean flanker task RT for correct responses.                                              |
| Flank_medRTcorr     | The median flanker task RT for correct responses.                                            |
| Flank_TOT_score     | The number of correct trials minus the number of incorrect trials for the flanker task.      |
| MenRot_0_CORRpc     | Percent of correct responses for mental rotation 0-degree rotation trials.                   |
| MenRot_0_meanRTcorr | Mean RT of correct responses for mental rotation 0-degree rotation trials.                   |
| MenRot_0_medRTcorr  | Median RT of correct responses for mental rotation 0-degree rotation trials.                 |
| MenRot_80_CORRpc    | Percent of correct responses for mental rotation 80-degree rotation trials.                  |

|                       |                                                                                                                    |
|-----------------------|--------------------------------------------------------------------------------------------------------------------|
| MenRot_80_meanRTcorr  | Mean RT of correct responses for mental rotation 80-degree rotation trials.                                        |
| MenRot_80_medRTcorr   | Median RT of correct responses for mental rotation 80-degree rotation trials.                                      |
| MenRot_120_CORRpc     | Percent of correct responses for mental rotation 120-degree rotation trials.                                       |
| MenRot_120_meanRTcorr | Mean RT of correct responses for mental rotation 120-degree rotation trials.                                       |
| MenRot_120_medRTcorr  | Median RT of correct responses for mental rotation 120-degree rotation trials.                                     |
| MenRot_160_CORRpc     | Mental rotation percent of correct responses for 160-degree rotation trials.                                       |
| MenRot_160_meanRTcorr | Mean RT of correct responses for mental rotation 160-degree rotation trials.                                       |
| MenRot_160_medRTcorr  | Median RT of correct responses for mental rotation 160-degree rotation trials.                                     |
| MenRot_TOT_CORRpc     | Percent of correct responses for mental rotation task.                                                             |
| MenRot_TOT_meanRTcorr | Mean RT of correct responses for mental rotation task.                                                             |
| MenRot_TOT_medRTcorr  | Median RT of correct responses for mental rotation task.                                                           |
| ICV                   | Estimated total intracranial volume (mm <sup>3</sup> ; Buckner et al., 2004).                                      |
| BrainSegVol           | The volume of brain as the sum of the volumes of the segmentations that are in the brain.                          |
| BrainSegVolNonVent    | The volume of brain as the sum of the volumes of the segmentations that are in the brain excluding the ventricles. |
| postCorCall_Vol       | Posterior corpus callosum (mm <sup>3</sup> ).                                                                      |
| midpostCorCall_Vol    | Middle posterior corpus callosum (mm <sup>3</sup> ).                                                               |
| centCorCall_Vol       | Central corpus callosum (mm <sup>3</sup> ).                                                                        |
| midantCorCall_Vol     | Middle anterior corpus callosum (mm <sup>3</sup> ).                                                                |
| antCorCall_Vol        | Anterior corpus callosum (mm <sup>3</sup> ).                                                                       |
| R_AvgCortThick        | Right hemisphere average cortical thickness (mm).                                                                  |
| L_AvgCortThick        | Left hemisphere average cortical thickness (mm).                                                                   |

|                    |                                                                      |
|--------------------|----------------------------------------------------------------------|
| R_TotCortSurfArea  | Right hemisphere total cortical surface area (mm <sup>2</sup> ).     |
| L_TotCortSurfArea  | Left hemisphere total cortical surface area (mm <sup>2</sup> ).      |
| R_Amy_Vol          | Right hemisphere amygdala volume (mm <sup>3</sup> ).                 |
| L_Amy_Vol          | Left hemisphere amygdala volume (mm <sup>3</sup> ).                  |
| R_Hipp_Vol         | Right hemisphere hippocampal volume (mm <sup>3</sup> ).              |
| L_Hipp_Vol         | Left hemisphere hippocampal volume (mm <sup>3</sup> ).               |
| R_rACC_Thick       | Right hemisphere rostral anterior cingulate cortical thickness (mm). |
| L_rACC_Thick       | Left hemisphere rostral anterior cingulate cortical thickness (mm).  |
| R_cMF_Thick        | Right hemisphere caudal middle frontal cortical thickness (mm).      |
| L_cMF_Thick        | Left hemisphere caudal middle frontal cortical thickness (mm).       |
| R_IOcc_Thick       | Right hemisphere lateral occipital thickness (mm).                   |
| L_IOcc_Thick       | Left hemisphere lateral occipital thickness (mm).                    |
| R_lingual_Thick    | Right hemisphere lingual thickness (mm).                             |
| L_lingual_Thick    | Left hemisphere lingual thickness (mm).                              |
| R_cACC_Thick       | Right caudal anterior cingulate thickness (mm).                      |
| L_cACC_Thick       | Left caudal anterior cingulate thickness (mm).                       |
| R_PCC_Thick        | Right posterior cingulate thickness (mm).                            |
| L_PCC_Thick        | Left posterior cingulate thickness (mm).                             |
| R_isthmusACC_Thick | Right isthmus cingulate thickness (mm).                              |
| L_isthmusACC_Thick | Left isthmus cingulate thickness (mm).                               |
| R_Parahipp_Thick   | Right parahippocampal thickness (mm).                                |
| L_Parahipp_Thick   | Left parahippocampal thickness (mm).                                 |
| R_Fform_Thick      | Right fusiform thickness (mm).                                       |
| L_Fform_Thick      | Left fusiform thickness (mm).                                        |
| R_supF_Thick       | Right superiorfrontal thickness (mm).                                |

|                   |                                                                                                                                                                                                     |
|-------------------|-----------------------------------------------------------------------------------------------------------------------------------------------------------------------------------------------------|
| L_supF_Thick      | Left superiorfrontal thickness (mm).                                                                                                                                                                |
| R_iPar_Thick      | Right inferiorparietal thickness (mm).                                                                                                                                                              |
| L_iPar_Thick      | Left inferiorparietal thickness (mm).                                                                                                                                                               |
| R_Ins_Thick       | Right insula thickness (mm).                                                                                                                                                                        |
| L_Ins_Thick       | Left insula thickness (mm).                                                                                                                                                                         |
| Health_Rating     | <i>Compared to other people how would you rate your physical health? (1 – much worse than average; 2 – worse than average; 3 – average; 4 – better than average; 5 – much better than average).</i> |
| Health_Satisfy    | <i>How satisfied are you with your present health? (1 – not at all satisfied; 2 – not very satisfied; 3 – neither satisfied nor dissatisfied; 4 – somewhat satisfied; 5 – extremely satisfied).</i> |
| STAI_tAnxiety     | <i>State-trait anxiety inventory for adults; Measure of trait anxiety (Score range 20-80; Spielberger and Gorsuch, 1970).</i>                                                                       |
| STAI_sAnxiety     | <i>State-trait anxiety inventory for adults; Measure of state anxiety (Score range 20-80).</i>                                                                                                      |
| NEO_N             | <i>The NEO Five-factor model of personality; Neuroticism score (Score range 0-48; Costa and McCrae, 1992).</i>                                                                                      |
| NEO_E             | <i>The NEO Five-factor model of personality; Extraversion score (Score range 0-48).</i>                                                                                                             |
| NEO_O             | <i>The NEO Five-factor model of personality; Openness score (Score range 0-48).</i>                                                                                                                 |
| NEO_A             | <i>The NEO Five-factor model of personality; Agreeableness score (Score range 0-48).</i>                                                                                                            |
| NEO_C             | <i>The NEO Five-factor model of personality; Conscientiousness score (Score range 0-48).</i>                                                                                                        |
| BISBAS_BAS_Drive  | <i>Behavioral inhibition (BIS) and behavioral activation (BAS) scale; BAS drive score (Score range 4-16; Carver and White, 1994).</i>                                                               |
| BISBAS_BAS_Fun    | <i>Behavioral inhibition (BIS) and behavioral activation (BAS) scale; BAS funseeking score (Score range 4-16).</i>                                                                                  |
| BISBAS_BAS_Reward | <i>Behavioral inhibition (BIS) and behavioral activation (BAS) scale; BAS reward score (Score range 5-20).</i>                                                                                      |
| BISBAS_BIS        | <i>Behavioral inhibition (BIS) and behavioral activation (BAS) scale; BIS score (Score range 7-28).</i>                                                                                             |

|                                   |                                                                                                                       |
|-----------------------------------|-----------------------------------------------------------------------------------------------------------------------|
| <i>MindWandering_Freq</i>         | <i>Imaginal process inventory; 12-question mind wandering subscale (Score range 12-60; Singer and Antrobus, 1970)</i> |
| <i>Barratt_tot</i>                | <i>Barratt Impulsivity Scale; Total score (Score range 30-120; Patton et al., 1995).</i>                              |
| <i>Barratt_2atten</i>             | <i>Barratt Impulsivity Scale; 2nd order attentional impulsiveness factor (Score range 8-32).</i>                      |
| <i>Barratt_2mot</i>               | <i>Barratt Impulsivity Scale; 2nd order motor factor (Score range 11-44).</i>                                         |
| <i>Barratt_2nonplan</i>           | <i>Barratt Impulsivity Scale; 2nd order non-planning factor (Score range 11-44).</i>                                  |
| <i>Barratt_1atten</i>             | <i>Barratt Impulsivity Scale; 1st order attentional factor (Score range 5-20).</i>                                    |
| <i>Barratt_1mot</i>               | <i>Barratt Impulsivity Scale; 1st order motor factor (Score range 7-28).</i>                                          |
| <i>Barratt_1selfcontrol</i>       | <i>Barratt Impulsivity Scale; 1st order self-control factor (Score range 6-24).</i>                                   |
| <i>Barratt_1complex</i>           | <i>Barratt Impulsivity Scale; 1st order cognitive complexity factor (Score range 5-20).</i>                           |
| <i>Barratt_1persever</i>          | <i>Barratt Impulsivity Scale; 1st order perseverance factor (Score range 4-16).</i>                                   |
| <i>Barratt_1instability</i>       | <i>Barratt Impulsivity Scale; 1st order cognitive instability factor (Score range 3-12).</i>                          |
| <i>DOSPERT_taking</i>             | <i>Domain-specific risk-tasking scale; Risk taking (Score range 40-280; Weber et al., 2002).</i>                      |
| <i>DOSPERT_perception</i>         | <i>Domain-specific risk-tasking scale; Risk perception (Score range 40-280).</i>                                      |
| <i>POMS_TotMdDisturb</i>          | <i>Profile of Mood States; Total Mood Disturbance score (Score range -20-100; McNair et al., 1971).</i>               |
| <i>POMS_T_TensionAnxiety</i>      | <i>Profile of Mood States; T-score Tension/Anxiety (Score range 30-67).</i>                                           |
| <i>POMS_T_DepressionDejection</i> | <i>Profile of Mood States; T-score Depression/Dejection (Score range 32-69).</i>                                      |
| <i>POMS_T_AngerHostility</i>      | <i>Profile of Mood States; T-score Anger/Hostility (Score range 36-76).</i>                                           |
| <i>POMS_T_VigorActivity</i>       | <i>Profile of Mood States; T-score Vigor/Activity (Score range 36-80).</i>                                            |
| <i>POMS_T_FatigueInertia</i>      | <i>Profile of Mood States; T-score Fatigue/Inertia (Score range 30-76).</i>                                           |

|                                     |                                                                                                                                                                                                                                                                                                                                                                                                                                                 |
|-------------------------------------|-------------------------------------------------------------------------------------------------------------------------------------------------------------------------------------------------------------------------------------------------------------------------------------------------------------------------------------------------------------------------------------------------------------------------------------------------|
| <i>POMS_T_ConfusionBewilderment</i> | <i>Profile of Mood States; T-score Confusion/Bewilderment (Score range 33-75).</i>                                                                                                                                                                                                                                                                                                                                                              |
| <i>TCI_Novelty</i>                  | <i>Temperament and Character Inventory (TCI-9); Novelty-seeking (Score range 20-100; Cloninger, 1987).</i>                                                                                                                                                                                                                                                                                                                                      |
| <i>TCI_RewardDependence</i>         | <i>Temperament and Character Inventory (TCI-9); Reward Dependence (Score range 20-100).</i>                                                                                                                                                                                                                                                                                                                                                     |
| <i>TCI_HarmAvoidance</i>            | <i>Temperament and Character Inventory (TCI-9); Harm Avoidance (Score range 20-100).</i>                                                                                                                                                                                                                                                                                                                                                        |
| <i>Shipley_Vocab_Raw</i>            | <i>Raw number correct for the Shipley vocabulary task (Score range 0-40).</i>                                                                                                                                                                                                                                                                                                                                                                   |
| <i>EstIQ_Shipley_Int_Bin</i>        | <i>Estimated IQ derived from Shipley-Hartford Age-Corrected T-Scores. Reported values are in integers. IQ scores are binned (2-point bins). Participants who scored from 124-125 are coded as 125, participants who scored from from 98-99 are coded as 99, etc.</i>                                                                                                                                                                            |
| <i>Matrix_WAIS</i>                  | <i>Matrix reasoning Wechsler Adult Intelligence Scale (WAIS) score.</i><br><br><i>Scoring rules are as follows:</i><br><i>1. Examinee receives 1 point for each correct response.</i><br><i>2. If the examinee obtains perfect scores on items 4 and 5, give full credit for items 1-3.</i><br><i>3. Discontinue after 4 consecutive errors or 4 errors on five consecutive trials.</i><br><i>4. Count trials with RT &lt; 300ms as errors.</i> |
| <i>EstIQ_Matrix_Int_Bin</i>         | <i>Estimated IQ derived through the OPIE3 formula (Schoenberg et al., 2002). Reported values are in integers. IQ scores are binned (2-point bins). Participants who scored from 124-125 are coded as 125, participants who scored from from 98-99 are coded as 99, etc.</i>                                                                                                                                                                     |

---

Note: Phenotypes listed in italics are available when requesting the extended data release (<http://neuroinformatics.harvard.edu/gsp/get/>).
